# Supplementary material for: Non-canonical role for the BAF complex subunit DPF3 in mitosis and ciliogenesis
Source: PubMed Central journal article supplement (PMC11166463; doi:10.1242/jcs.261744), 2024-05-13
Supplement: joces-137-261744-s1.pdf [file joces-137-261744-s1.pdf]

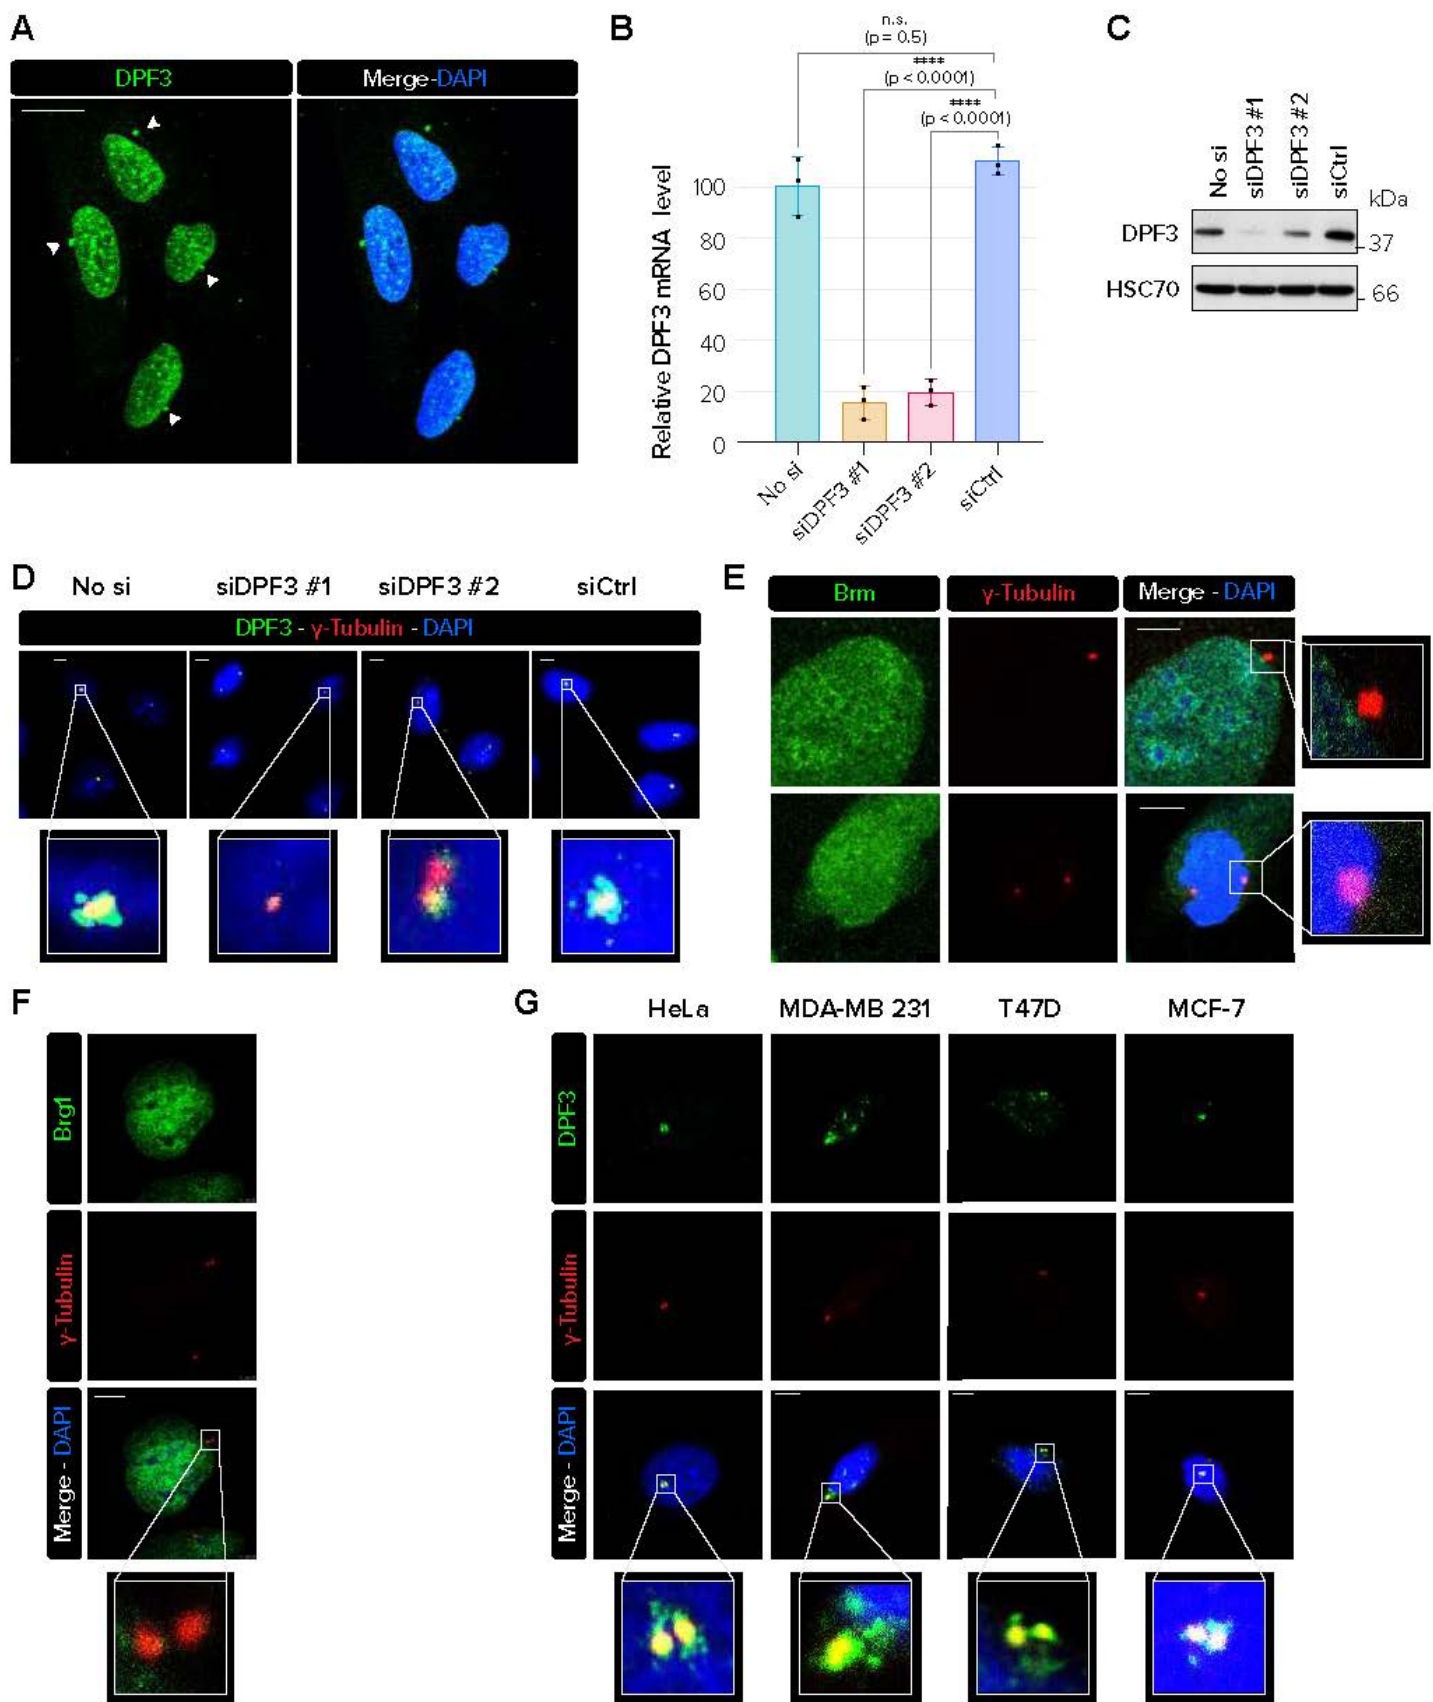

**Fig. S1. Localization of DPF3 and other BAF subunits and specificity of the DPF3 staining at centrosome**

**(A)** U2OS were fixed with methanol/acetone (80/20) and stained for DPF3. Several cells are shown and are representative of the total population. Individual channels for DPF3 (in green) and merged channels with DAPI nuclear staining (in blue) are shown. Scale bar = 10  $\mu$ m. **(B-C)** U2OS

cells were mock-transfected (No si) or transfected with one of two different DPF3 siRNAs (siDPF3 #1 and siDPF3 #2) or control siRNA (siCtrl). RNA and protein extracts were prepared in parallel and analyzed by RT-qPCR (**B**) or western blotting (**C**), respectively. (**D**) U2OS cells were mock-transfected (No si) or transfected with one of two different DPF3 siRNAs (siDPF3 #1 and siDPF3 #2) or control siRNA (siCtrl) and co-stained for DPF3 (in green) and  $\gamma$ -tubulin (in red). Merged channels with DAPI nuclear staining (in blue) and magnification of boxed regions are shown. Scale bar = 5  $\mu$ m. (**E**) U2OS cells co-stained for Brm (in green) and  $\gamma$ -tubulin (in red). Individual channels, merged channels with DAPI nuclear staining (in blue) and magnification of boxed regions are shown. Scale bar = 10  $\mu$ m. (**F**) U2OS cells co-stained for Brg1 (in green) and  $\gamma$ -tubulin (in red). Individual channels, merged channels with DAPI nuclear staining (in blue) and magnification of boxed regions are shown. Scale bar = 5  $\mu$ m. (**G**) DPF3 (in green) and  $\gamma$ -tubulin (in red) were co-stained in HeLa, MDA-MB 231, T47D and MCF-7 (from top to bottom). Individual channels, merged channels with DAPI nuclear staining (in blue) and magnification of boxed regions are shown. Scale bar = 5  $\mu$ m.

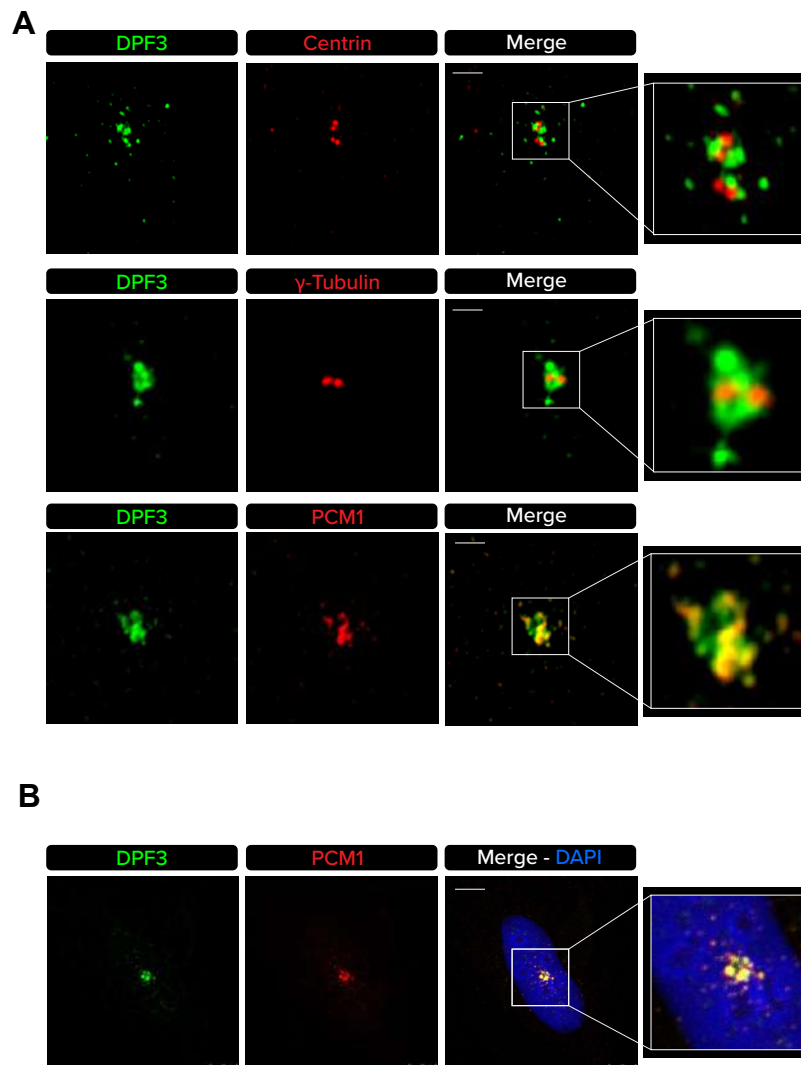

**Fig. S2. Co-localization of DPF3 with centriolar satellites in HeLa cells**

(A) HeLa cells co-stained for DPF3 (in green) and centrin,  $\gamma$ -tubulin or PCM1 (in red). Individual channels, merged channels and magnification of boxed regions are shown. Scale bar = 2  $\mu$ m. Image was captured with Zeiss LSM 880 Airyscan High Resolution (HR) microscope. (B) HeLa cells were co-stained for DPF3 (in green) and PCM1 (in red). Individual channels, merged channels with DAPI nuclear staining (in blue), and magnification of boxed regions are shown. Scale bar = 5  $\mu$ m. Image was captured with Leica TCS SP5 laser scanning confocal microscope.

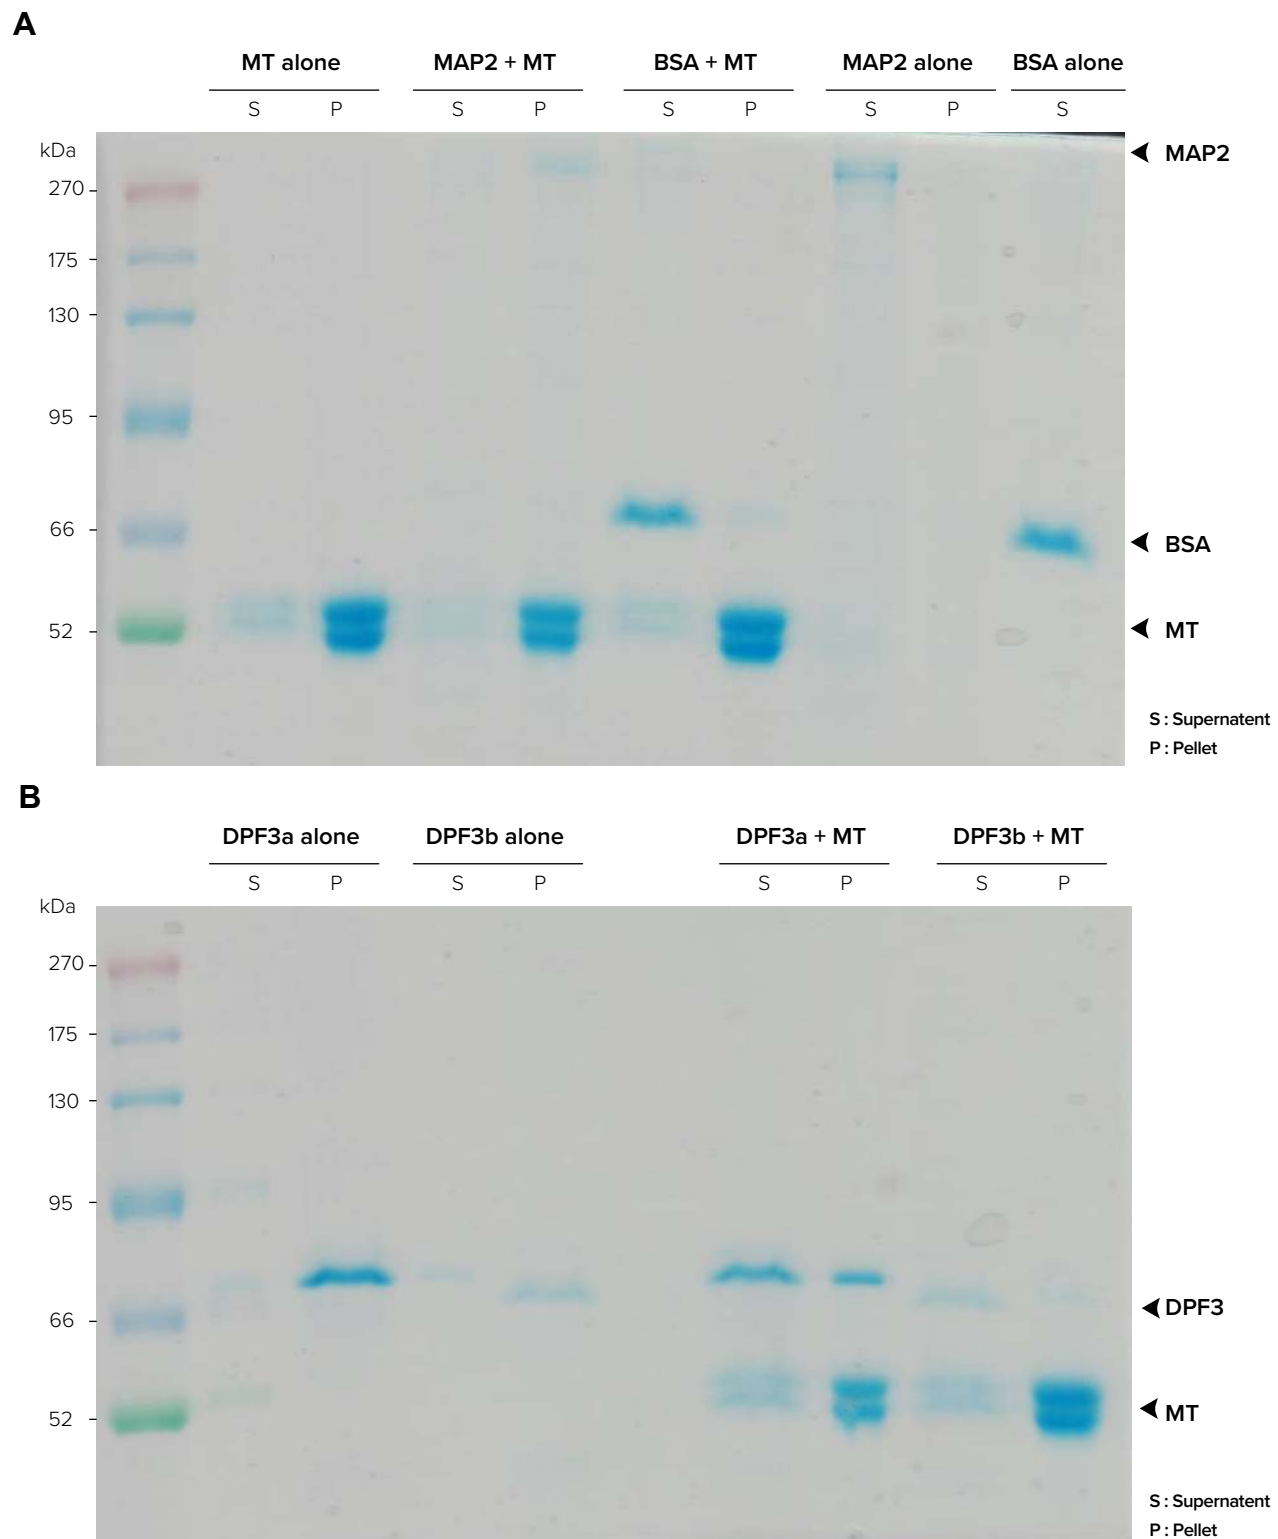

**Fig. S3. DPF3a and to a lesser extent DPF3b interact with microtubules**

(A) Taxol-stabilized microtubules were incubated or not with purified MAP2 (positive control) or BSA (negative control) and sedimented by ultracentrifugation. The supernatant (S) and pellet (P) fractions were run on a SDS gel and stained with Coomassie blue. (B) Taxol-stabilized microtubules were incubated or not with purified GST-DPF3a or GST-DPF3b and sedimented by ultracentrifugation. The supernatant (S) and pellet (P) fractions were analyzed by SDS-PAGE followed by Coomassie blue staining.

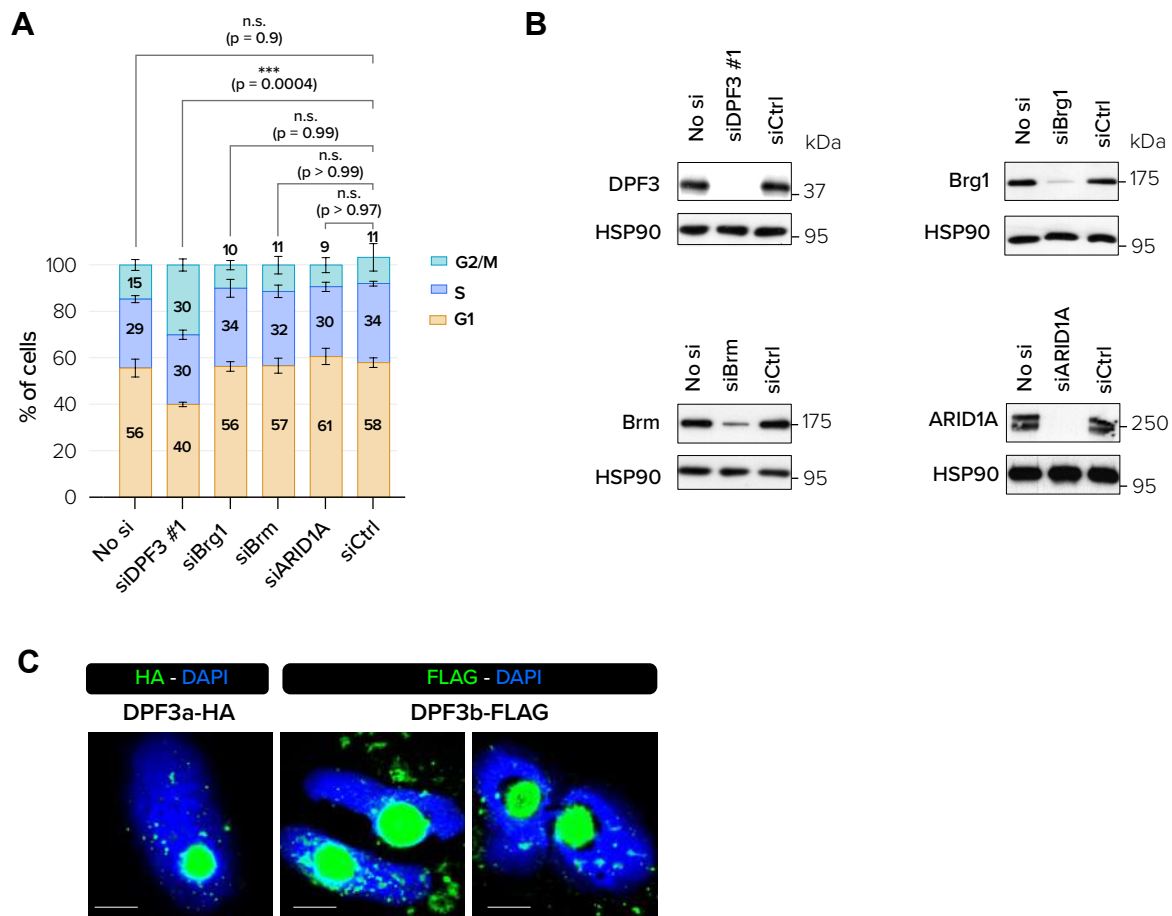

**Fig. S4. Depletion of DPF3 but not the core subunits of the BAF complex blocks cells in G2/M** (A) Cell cycle analysis of U2OS cells transfected with control siRNA (siCtrl), DPF3 siRNA (siDPF3 #1), Brm siRNA, Brg1 siRNA, or ARID1A siRNA. Graph shows means +/- S.D. from 3 independent experiments. P-values were calculated using one-way ANOVA with Tukey post-hoc test. (B) In parallel, protein from U2OS cells transfected as in A were extracted and analyzed by western blotting for the indicated proteins. (C) U2OS cells were transfected with DPF3-HA or DPF3B-FLAG plasmids for 24 hours and processed for immunofluorescence staining using HA or FLAG antibodies (in green). Merged channels with DAPI nuclear staining (in blue) are shown. Scale bar = 5 μm

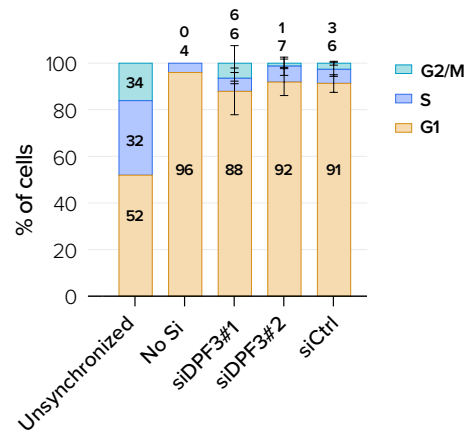

**Fig. S5. Serum starvation blocks DPF3-depleted hTERT-RPE-1 cells in G0/G1**

Cell cycle analysis of asynchronous hTERT-RPE-1 cells or hTERT-RPE-1 cells mock-transfected (No si) or transfected with one of two different DPF3 siRNAs (siDPF3 #1 and siDPF3 #2) or control siRNA (siCtrl) and serum starved for 48 hours. Results are representative of one experiment performed twice.

### Blots in Fig. 1

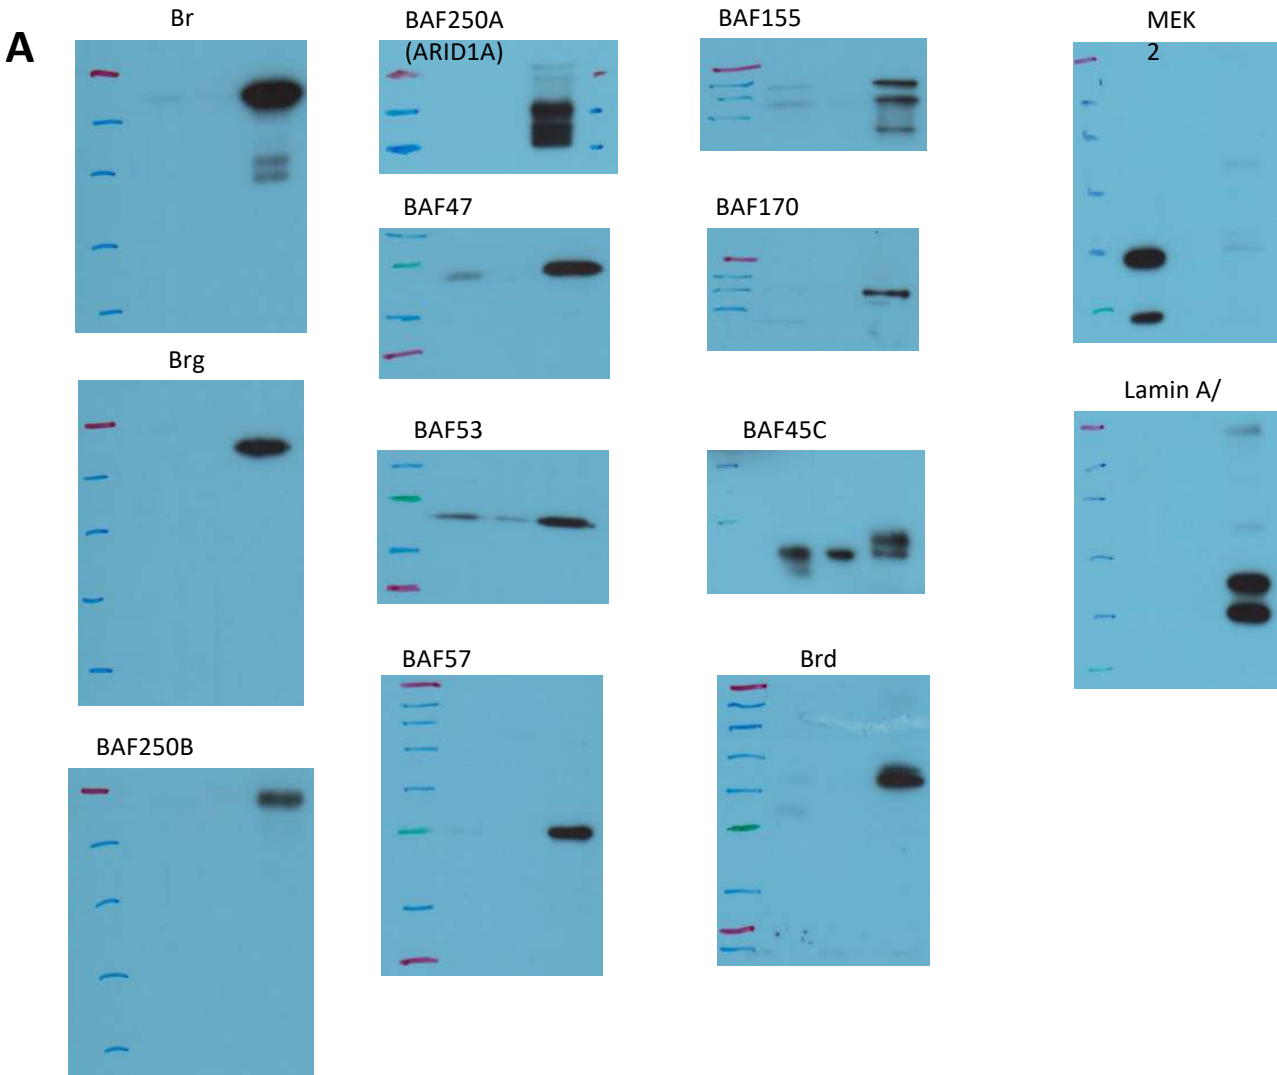

## Blots in Fig. 1

**B**

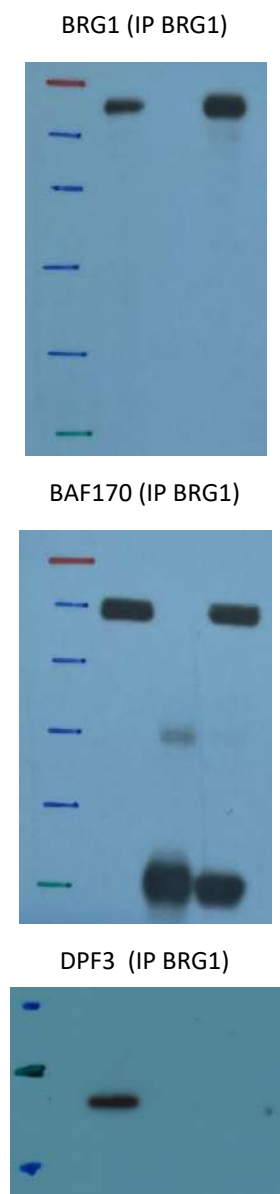

**C**

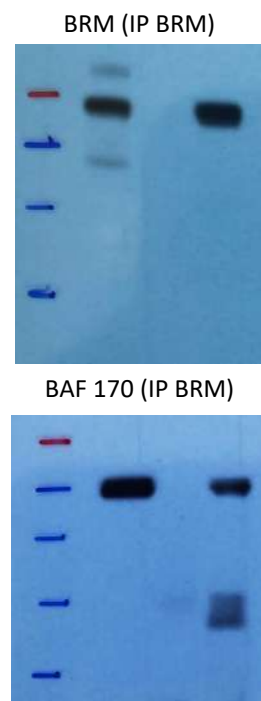

**H**

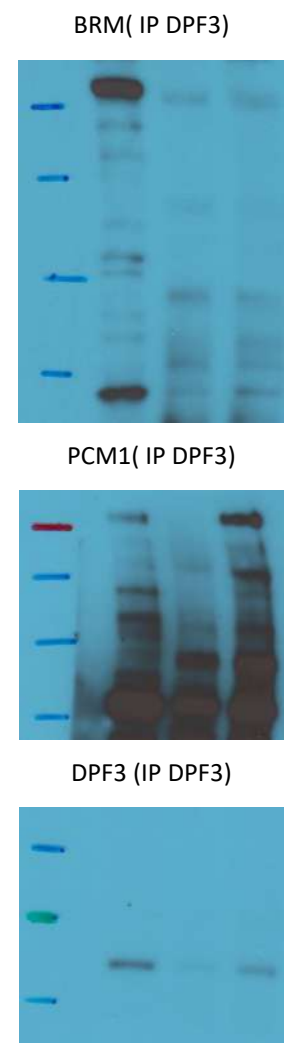



### Blots in Fig. 3

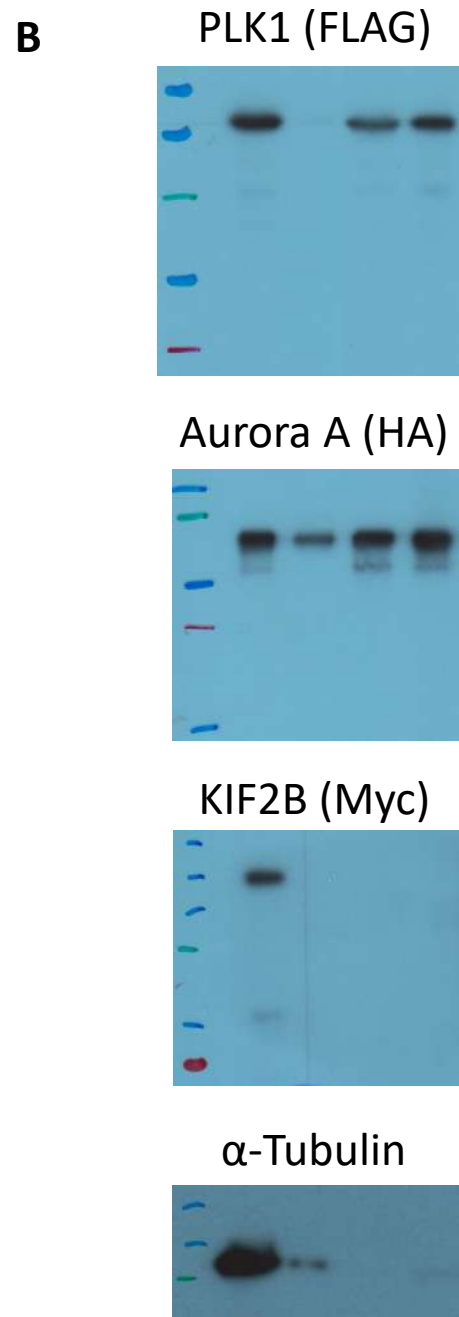

### Blots in Fig. 4

**B**

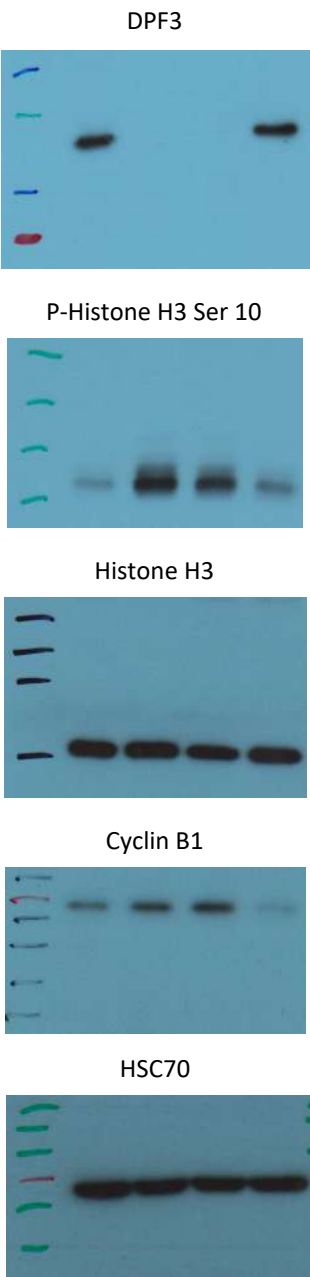

**F**

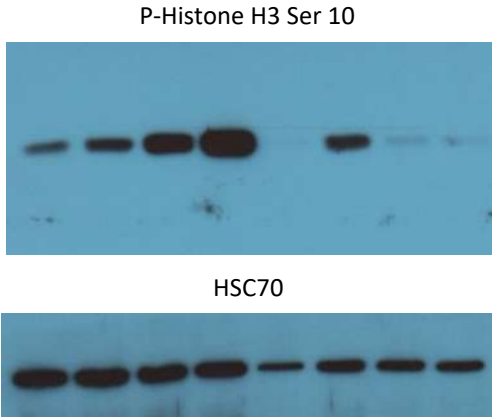

## Blots in Fig. 6

C

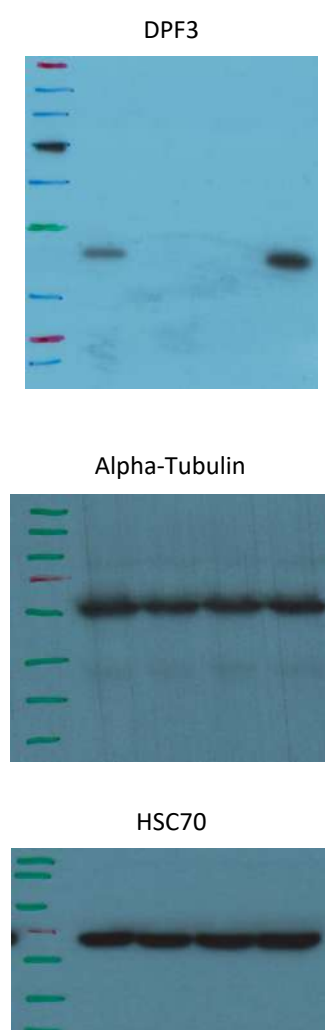

### Blots in Fig. 7

**G**

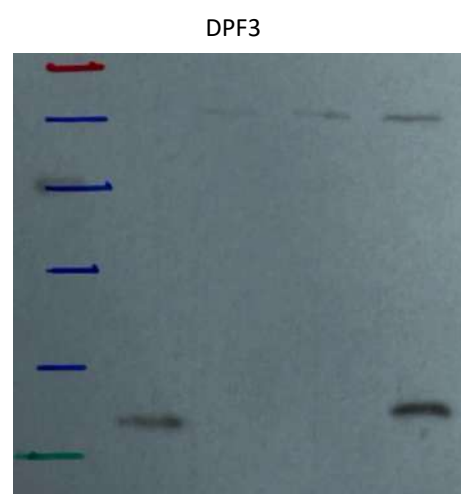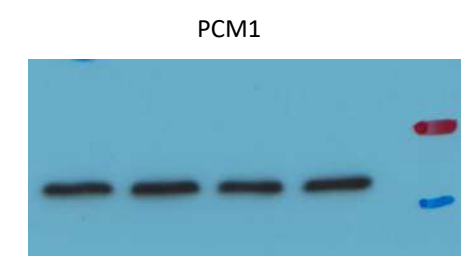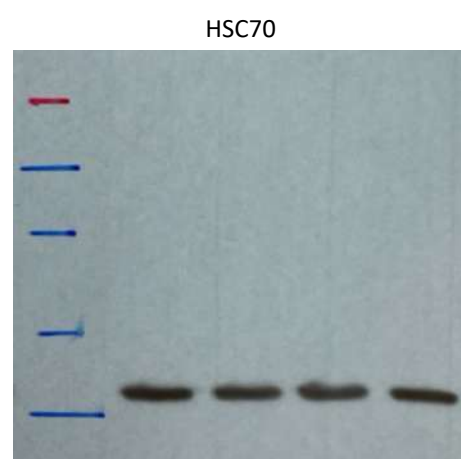

## Blots in Fig. S1

C

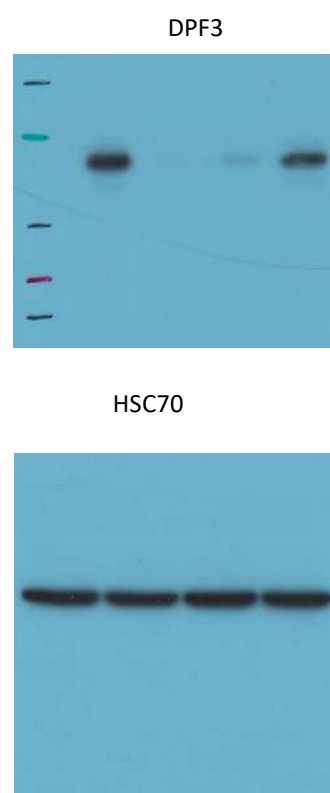

## Blots in Fig. S4

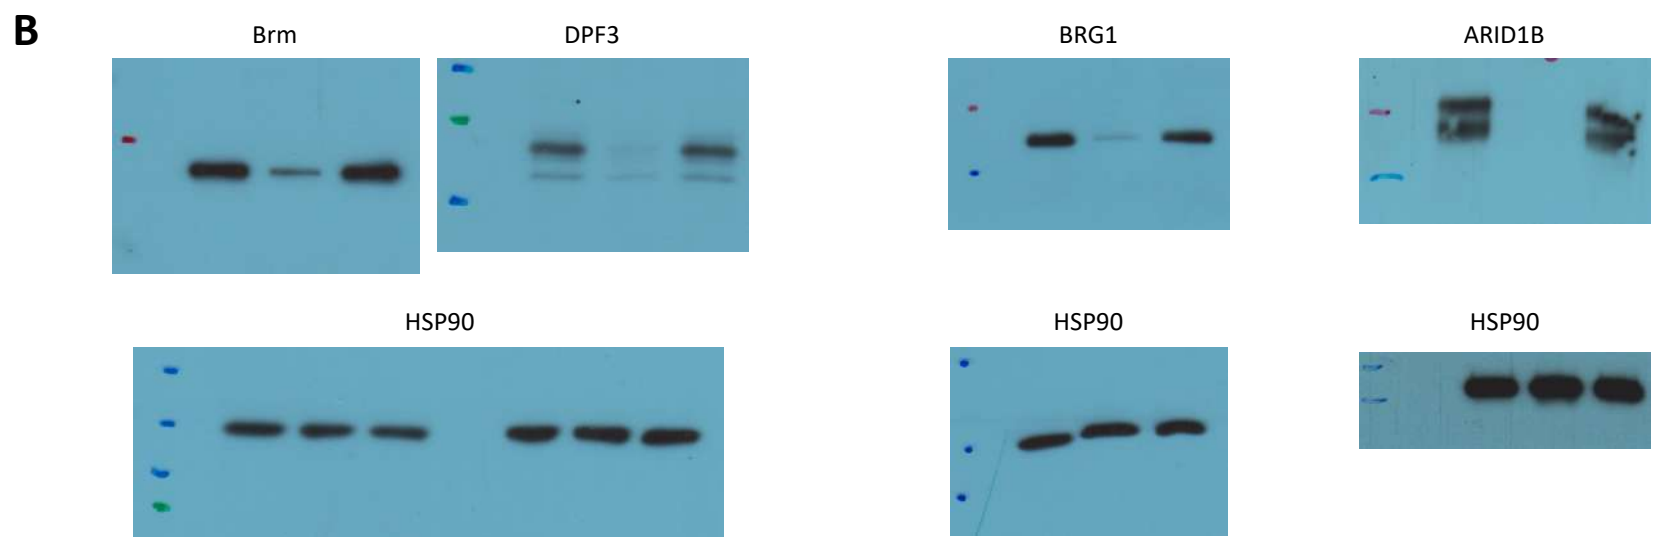

Fig. S6. Blot Transparency

**Table S1. siRNA sequences**

| siRNA           | Sense Sequence 5' → 3'                  | Anti-sense Sequence 3' → 5' |
|-----------------|-----------------------------------------|-----------------------------|
| ARID1A          | GCCCUGAACAAUAACCUCA                     | UGAGGUUUAUUGUUCAGGGC        |
| Brm             | GUCCUGGACCUCCAAGUGUCU                   | AGACACUUGGAGGUCCAGGAC       |
| Brg1            | Santa Cruz Biotechnology<br>(#sc-29827) |                             |
| DPF3 #1         | CCCAGAACAACUGCUACAUTT                   | AUGUAGCAGUUGUUCUGGGTT       |
| DPF3 #2         | GGAGGAAAGCAUCCAGGAATT                   | UUCUGGAUGCUUUCUCCTT         |
| GI3<br>(siCtrl) | CUUACGCUGAGUACUUCGAU                    | AAUCGAAGUACUCAGCGUAAU       |

**Table S2. Sequences of primers used in qPCR experiments**

| mRNA    | Reverse sequence 5' → 3' | Forward Sequence 5' → 3' |
|---------|--------------------------|--------------------------|
| DPF3a/b | TTCCTGGATGCTTTCCTCCT     | GGCTGCTGGAGATAAAACCTGA   |
| β-actin | AGAGGCGTACAGGGATAGCA     | AGAAAATCTGGCACCCACACC    |

**Table S3. Antibodies used in western blotting experiments**

| Antibody             | Company                      | Catalogue number | RRID        | Working dilution |
|----------------------|------------------------------|------------------|-------------|------------------|
| α-tubulin<br>(11H10) | Cell Signaling               | #2125            | AB_2619646  | 1:5000           |
| β-actin              | Santa Cruz                   | #sc-69879        | AB_2714189  | 1:5000           |
| ARID1A               | Abcam                        | #Ab182560        |             | 1:1000           |
| ARID1B               | Novus a bio-<br>techne brand | #NBP1-89358      | AB_11032492 | 1:1000           |
| BAF47                | Cell Signaling               | #91735           | AB_2800172  | 1:1000           |
| BAF53                | Cell Signaling               | #43910           | AB_2799251  | 1:1000           |
| BAF57                | Bethyl                       | #A300-810A-T     | AB_2779472  | 1:1000           |
| BAF155               | Cell Signaling               | #11956           | AB_2797776  | 1:1000           |
| BAF170               | Cell Signaling               | #12760           | AB_2798017  | 1:1000           |
| Brd9                 | Cell Signaling               | #71232           | AB_2799798  | 1:1000           |
| Brg1                 | Cell Signaling               | #3508            | AB_2193944  | 1:1000           |

|                                                                                     |                                                                                                         |                                                                               |                                               |                                   |
|-------------------------------------------------------------------------------------|---------------------------------------------------------------------------------------------------------|-------------------------------------------------------------------------------|-----------------------------------------------|-----------------------------------|
| Brg1 (E8V5B)                                                                        | Cell Signaling                                                                                          | #72182                                                                        | AB_2799815                                    | 1:1000                            |
| Brm                                                                                 | Novus a bio-<br>techne brand                                                                            | #NBP1-90015                                                                   | AB_11031434                                   | 1:1000                            |
| Brm                                                                                 | BD transduction<br>laboratories                                                                         | #610389                                                                       | AB_397772                                     | 1:2000                            |
| Cylin B1                                                                            | Santa Cruz<br>Biotechnology                                                                             | #sc-752                                                                       | AB_2072134                                    | 1:1000                            |
| DPF3<br>(E7F7N)                                                                     | Cell Signaling                                                                                          | #82788                                                                        |                                               | 1:500                             |
| FLAG                                                                                | Sigma                                                                                                   | #F1804                                                                        | AB_262044                                     | 1:2000                            |
| HA (C29F4)                                                                          | Cell Signaling                                                                                          | #3724                                                                         | AB_1549585                                    | 1:1000                            |
| Histone H3                                                                          | Cell Signaling                                                                                          | #9715                                                                         | AB_331563                                     | 1:2000                            |
| Phospho-H3<br>(Ser10)                                                               | Cell Signaling                                                                                          | #3377                                                                         | AB_1549592                                    | 1:2000                            |
| HSC70                                                                               | Santa Cruz                                                                                              | #sc-7298                                                                      | AB_627761                                     | 1:5000                            |
| Lamin A/C                                                                           | Millipore                                                                                               | #MAB3211                                                                      | AB_94752                                      | 1:1000                            |
| Mek2                                                                                | Santa Cruz                                                                                              | #sc-13159                                                                     | AB_627923                                     | 1:1000                            |
| c-Myc(Y69)                                                                          | Abcam                                                                                                   | #ab32072                                                                      | AB_731658                                     | 1:1000                            |
| PCM1                                                                                | Cell Signaling                                                                                          | #5213                                                                         | AB_10556960                                   | 1:1000                            |
| Secondary<br>antibodies<br>conjugated<br>with<br>horseradish<br>peroxidase<br>(HRP) | Anti-Rabbit HRP<br>Antibody<br><br>Anti-Mouse HRP<br>Antibody<br><br>Rabbit anti-goat<br>IgG HRP-linked | Cell Signaling<br>#7074<br><br>Dako #P0260<br><br>Life Technologies<br>#31402 | AB_2099233<br><br>AB_2636929<br><br>AB_228395 | All used<br>1:5000 to<br>1:10,000 |

**Table S4. Antibodies used in immunoprecipitation experiments**

| Antibody     | Company        | Catalogue number | RRID       | Working dilution |
|--------------|----------------|------------------|------------|------------------|
| Brm (D9E8B)  | Cell Signaling | #11966           | AB_2797783 | 2-4 µg/ IP       |
| Brg1 (D1Q7F) | Cell Signaling | #49360           | AB_2728743 | 2-4 µg/ IP       |
| DPF3 (E7F7N) | Cell Signaling | #82788           |            | 2 µg/ IP         |



**Table S5. Antibodies used in immunofluorescence experiments**

| Antibody                     | Company                      | Catalogue number                                         | RRID                       | Working dilution |
|------------------------------|------------------------------|----------------------------------------------------------|----------------------------|------------------|
| $\alpha$ -tubulin (11H10)    | Cell Signaling               | #2125                                                    | AB_2619646                 | 1:500            |
| $\alpha$ -tubulin (DM1A)     | Cell Signaling               | #3873                                                    | AB_1904178                 | 1:500            |
| Y-tubulin                    | Santa Cruz                   | #sc-51715                                                | AB_630410                  | 1:500            |
| Y-tubulin                    | Genetex                      | #GTX113286                                               | AB_1952442                 | 1:500            |
| Acetylated $\alpha$ -tubulin | Santa Cruz                   | #sc-23950                                                | AB_628409                  | 1:500            |
| Aurora B                     | Abcam                        | #ab3609                                                  | AB_449204                  | 1:100            |
| CENP-A                       | Invitrogen                   | #MA1-20832                                               | AB_2078763                 | 1:500            |
| CENP-E                       | Active Motif                 | # 39619                                                  | AB_2793278                 | 1:200            |
| Centrin-2                    | Millipore                    | #04-1624                                                 | AB_10563501                | 1:100            |
| CREST                        | Immunovision                 | #HCT-0100                                                | <a href="#">AB_2744669</a> | 1:1000           |
| CT-K                         | BD transduction laboratories | #61376                                                   |                            | 1:500            |
| DPF3                         | Biorbyt                      | #Orb182556                                               |                            | 1:200            |
| FLAG                         | Sigma                        | #F1804                                                   | AB_262044                  | 1:500            |
| HA                           | Cell Signaling               | #3724                                                    | AB_1549585                 | 1:500            |
| IFT88                        | Proteintech                  | #13967-1-AP                                              | AB_2121979                 | 1:500            |
| KIF4A                        | Novus a bio-<br>techne brand | #NBP2-56589                                              |                            | 1:500            |
| MKPL2/KIF20A                 | Abnova                       | #H00010112-B01                                           | AB_1146023                 | 1:500            |
| PCM1                         | Santa Cruz<br>Biotechnology  | #sc-398365                                               | AB_2827155                 | 1:500            |
| PRC1                         | Invitrogen                   | # <b>MA1-846</b>                                         | AB_1086772                 | 1:200            |
| Secondary antibodies         | Thermo Fisher<br>Scientific  | Goat anti Rabbit<br>IgG Alexa Fluor<br>488 conjugate #A- | AB_2576217                 |                  |

|                               |  |                                                                                                                                                                                                                                                                                                     |                                                             |                    |
|-------------------------------|--|-----------------------------------------------------------------------------------------------------------------------------------------------------------------------------------------------------------------------------------------------------------------------------------------------------|-------------------------------------------------------------|--------------------|
| conjugated with<br>Alexa dyes |  | 11034<br>Donkey anti-rabbit<br>IgG, Alexa Fluor<br>488 conjugate #A-<br>21206<br>Goat anti-Mouse<br>IgG, Alexa Fluor<br>488 conjugate #A-<br>11001<br>Donkey anti-<br>Mouse IgG, Alexa<br>Fluor 546<br>conjugate #A-<br>10036<br>Goat anti-rabbit<br>IgG, Alexa Fluor<br>546 conjugate #A-<br>11035 | AB_2535792<br>AB_2534069<br><br>AB_2534012<br><br>AB_143051 | All used<br>1:2000 |
|-------------------------------|--|-----------------------------------------------------------------------------------------------------------------------------------------------------------------------------------------------------------------------------------------------------------------------------------------------------|-------------------------------------------------------------|--------------------|

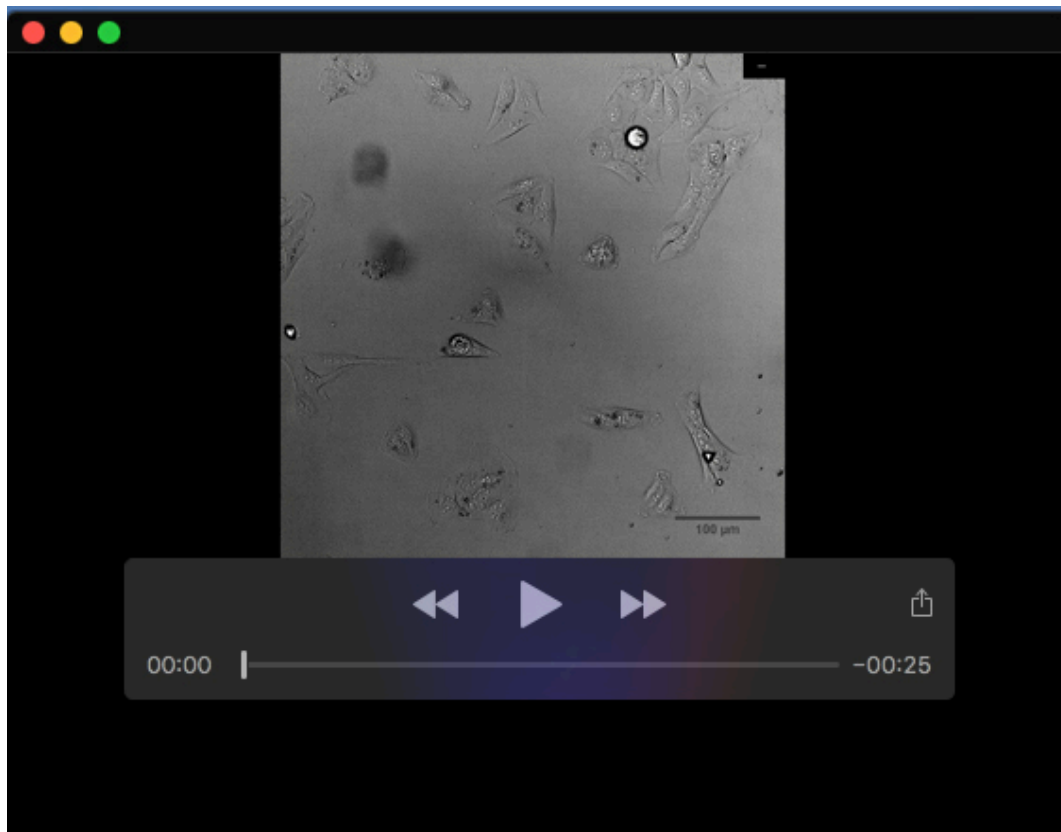

**Movie 1. Live-cell imaging of U2OS cells transfected with control siRNA (siCtrl).** Cells were transfected for 16 hours using calcium phosphate precipitation method and recovered for 8 hours. Live imaging was then started. Images were acquired every 10 min for a total of 24 hours.

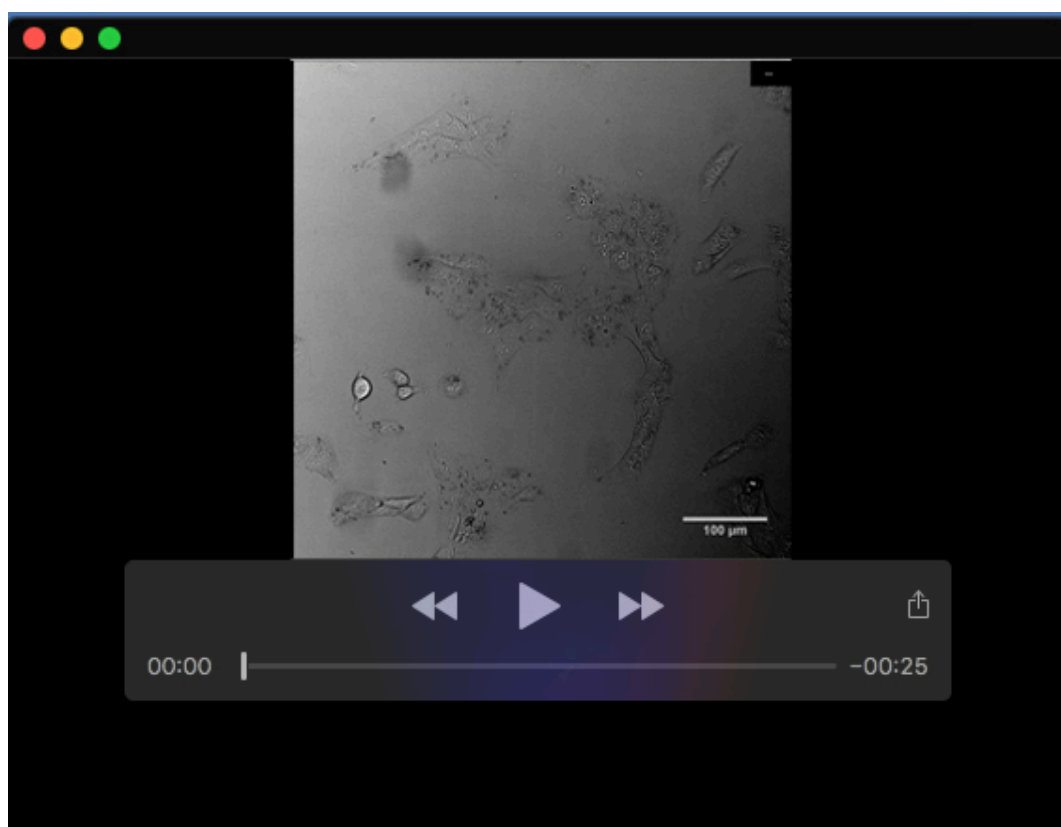

**Movie 2. Live-cell imaging of U2OS cells transfected with DPF3 siRNA (si DPF3#1).** Cells were transfected for 16 hours using calcium phosphate precipitation method and recovered for 8 hours. Live imaging was then started. Images were acquired every 10 min for a total of 24 hours. DPF3-depleted cells spent an unusually long time in mitosis. They did undergo mitosis and showed induction of post-mitotic apoptotic cell death.

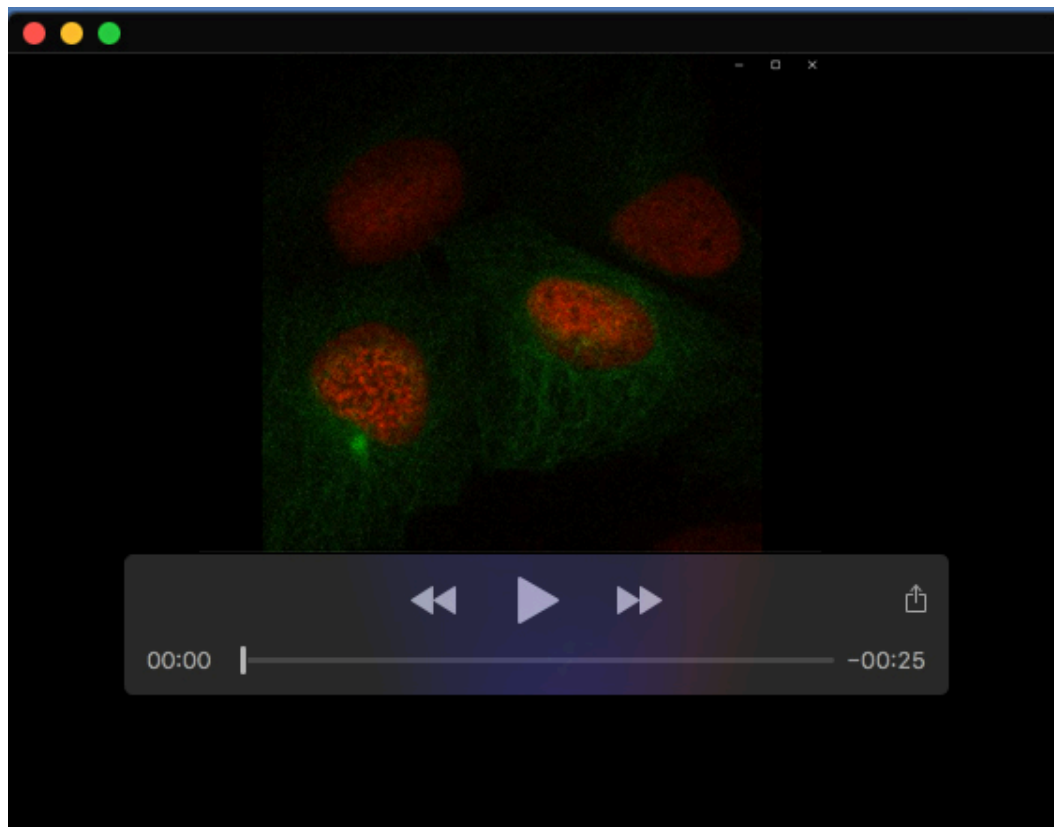

**Movie 3.** Fluorescent live-cell imaging of H2B-RFP/ $\alpha$ -actin-GFP U2OS cells transfected with control siRNA (siCtrl).

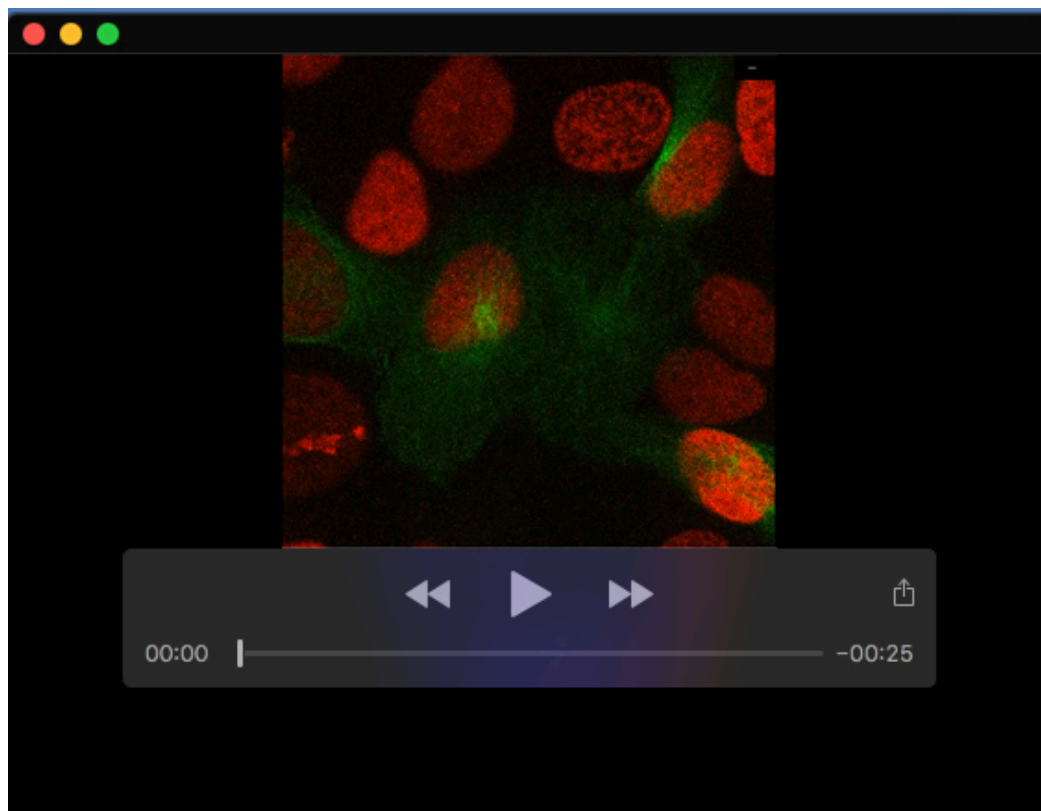

**Movie 4.** Fluorescent live-cell imaging of H2B-RFP/ $\alpha$ -actin-GFP U2OS cells transfected with DPF3 siRNA (si DPF3#1). DPF3-depleted cells exhibited chromosome hyper-oscillations and spent an unusually long time in mitosis.

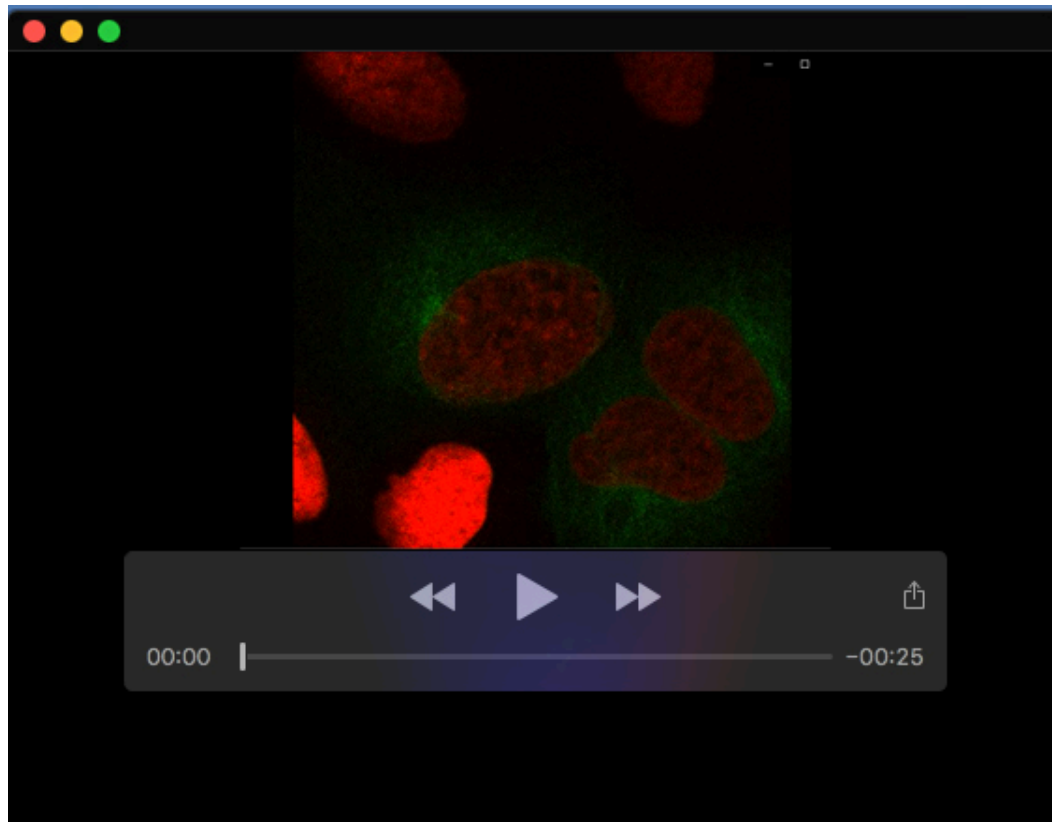

**Movie 5.** Fluorescent live-cell imaging of H2B-RFP/ $\alpha$ -actin-GFP U2OS cells transfected with DPF3 siRNA (si DPF3#1). DPF3-depleted cells exhibited chromosome hyper-oscillations and spent an unusually long time in mitosis.

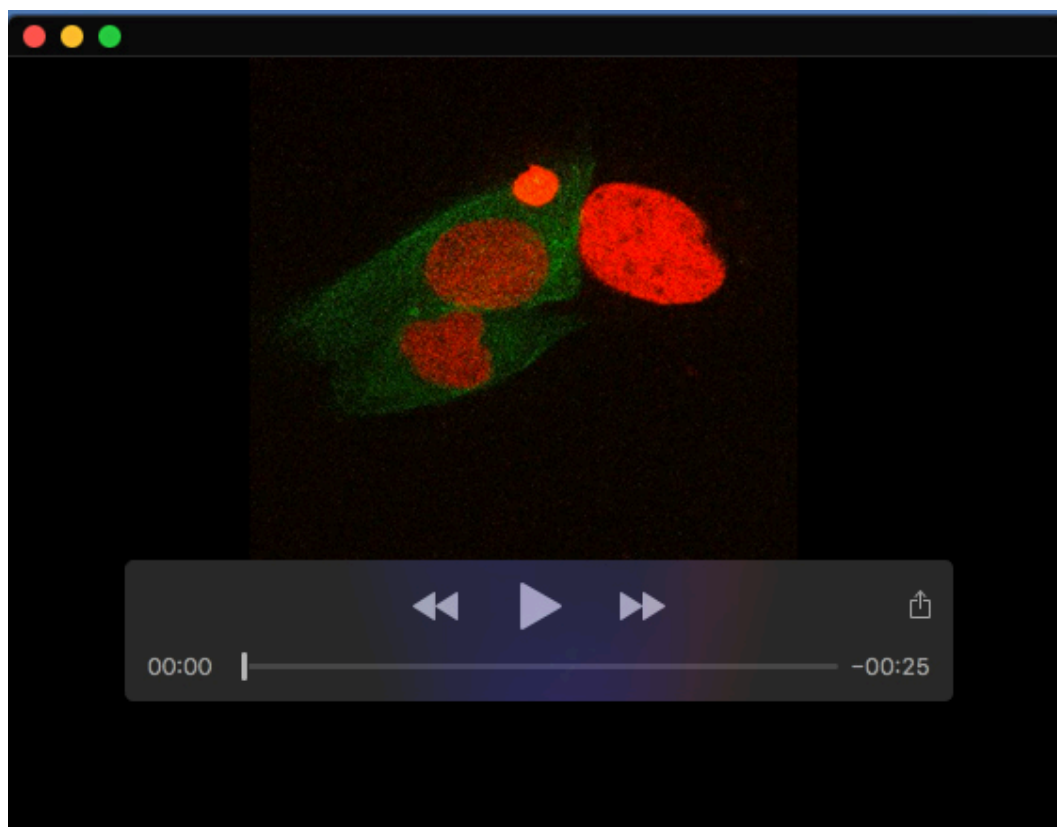

**Movie 6.** Fluorescent live-cell imaging of H2B-RFP/ $\alpha$ -actin-GFP U2OS cells transfected with DPF3 siRNA (si DPF3#1). DPF3-depleted cells did undergo anaphase and subsequent cytokinesis, leading to asynchronous/unscheduled chromatid separation.

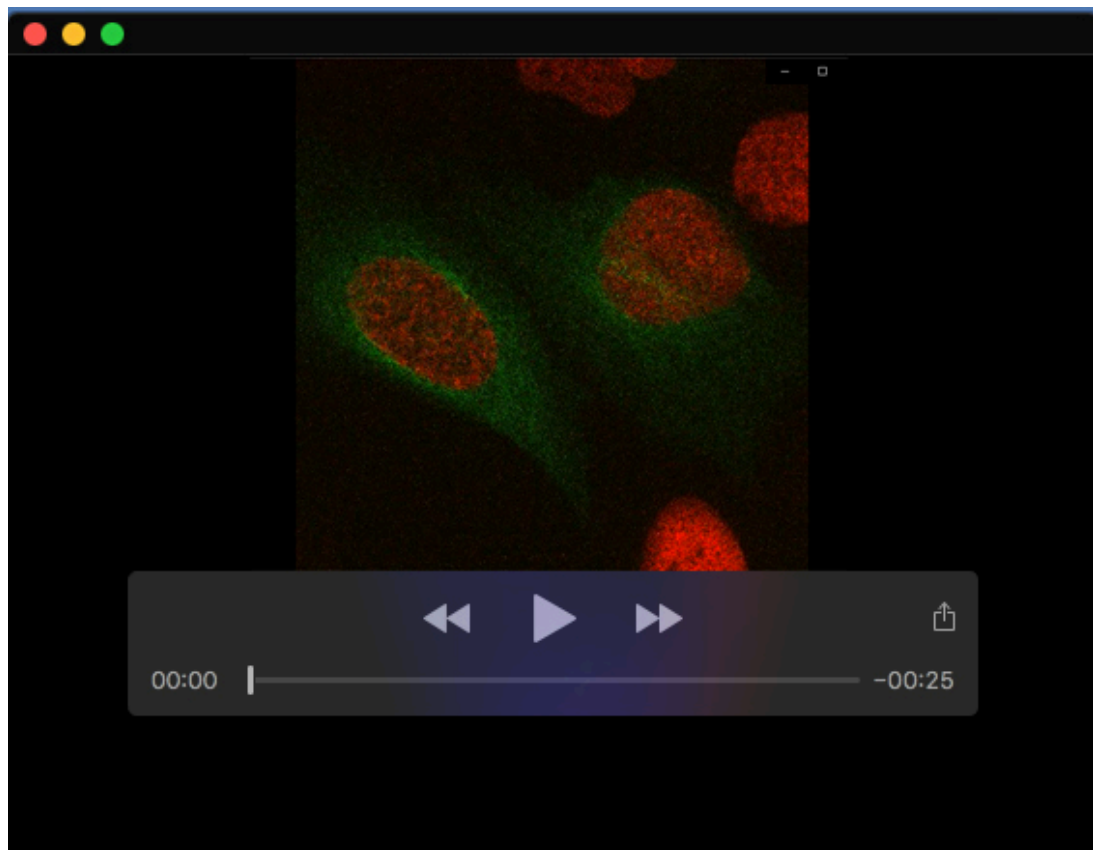

**Movie 7.** Fluorescent live-cell imaging of H2B-RFP/ $\alpha$ -actin-GFP U2OS cells transfected with DPF3 siRNA (si DPF3#1). DPF3-depleted cells did undergo anaphase and subsequent cytokinesis, leading to formation of nuclei with irregular shapes (formation of bi/multi-lobed nuclei).

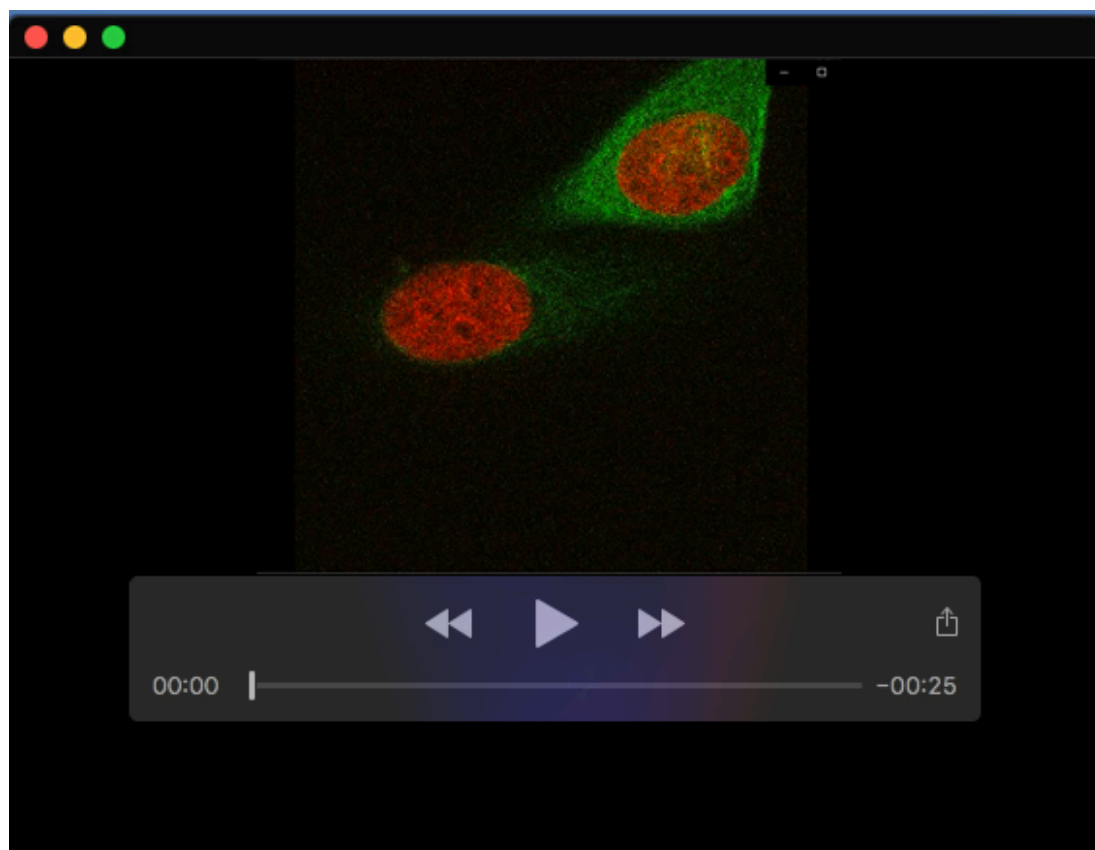

**Movie 8.** Fluorescent live-cell imaging of H2B-RFP/ $\alpha$ -actin-GFP U2OS cells transfected with DPF3 siRNA (si DPF3#1). DPF3-depleted cells showed induction of post-mitotic apoptotic cell death.
